# Supplementary material for: Network topology and cannabis use following two weeks of monitored abstinence: moderation of sex and patterns of use findings
Source: Frontiers journal article supplement (doi:10.3389/fradm.2025.1549771), 2025-03-26
Supplement: Data_Sheet_1.pdf [file Data_Sheet_1.pdf]

## *Supplementary Material*

### **1 MRI Preprocessing**

Results included in this manuscript come from preprocessing performed using fMRIPrep 22.1.1 (Esteban et al., 2019; Markiewicz et al., 2024; RRID:SCR\_016216), which is based on Nipype 1.8.5 (Esteban et al., 2022; Gorgolewski et al., 2011; RRID:SCR\_002502).

#### **1.1 Anatomical data preprocessing**

For each subject, there were at least 2 T1w images. Each image was corrected for intensity non-uniformity (INU) with N4BiasFieldCorrection (Tustison et al., 2010), distributed with ANTs 2.3.3 (Avants et al., 2008, RRID:SCR\_004757). The T1w-reference was then skull-stripped with a Nipype implementation of the antsBrainExtraction.sh workflow (from ANTs), using OASIS30ANTs as target template. Brain tissue segmentation of cerebrospinal fluid (CSF), white-matter (WM) and gray-matter (GM) was performed on the brain-extracted T1w using fast (FSL 6.0.5.1:57b01774, RRID:SCR\_002823, Zhang et al., 2001). A T1w-reference map was computed after registration of the T1w images (after INU-correction) using mri\_robust\_template (FreeSurfer 7.2.0, Reuter et al., 2010). Volume-based spatial normalization to two standard spaces (MNI152NLin2009cAsym, MNI152NLin6Asym) was performed through nonlinear registration with antsRegistration (ANTs 2.3.3), using brain-extracted versions of both T1w reference and the T1w template. The following templates were selected for spatial normalization: ICBM 152 Nonlinear Asymmetrical template version 2009c (Fonov et al., 2009), RRID:SCR\_008796; TemplateFlow ID: MNI152NLin2009cAsym], FSL's MNI ICBM 152 non-linear 6th Generation Asymmetric Average Brain Stereotaxic Registration Model (Evans et al., 2012); RRID:SCR\_002823; TemplateFlow ID: MNI152NLin6Asym).

#### **1.2 Functional data preprocessing**

For each functional MRI (fMRI) scan, the following preprocessing steps were performed. First, a reference volume and its skull-stripped version were generated using a custom methodology of fMRIPrep. Head-motion parameters with respect to the BOLD reference (transformation matrices, and six corresponding rotation and translation parameters) are estimated before any spatiotemporal filtering using mcflirt (FSL 6.0.5.1:57b01774, Jenkinson et al., 2002). The BOLD time-series (including slice-timing correction when applied) were resampled onto their original, native space by applying the transformations to correct for head-motion. These resampled BOLD time-series will be referred to as preprocessed BOLD in original space, or just preprocessed BOLD. The BOLD reference was then co-registered to the T1w reference using mri\_coreg (FreeSurfer) followed by flirt (FSL 6.0.5.1:57b01774, Jenkinson and Smith, 2001) with the boundary-based registration (Greve and Fischl 2009) cost-function. Co-registration was configured with nine degrees of freedom to account for distortions remaining in the BOLD reference.

Several confounding time-series were calculated based on the preprocessed BOLD: framewise displacement (FD), DVARS and three region-wise global signals. FD was computed using two formulations following Power [absolute sum of relative motions, Power et al. (2014)] and Jenkinson [relative root mean square displacement between affines, Jenkinson et al. (2002)]. FD and DVARS are calculated for each functional run, both using their implementations in Nipype [following the definitions by Power et al., 2014)]. Frames that exceeded a threshold of 0.5 mm FD or 1.5 standardized DVARS were annotated as motion outliers.

The BOLD time-series were resampled into standard space, generating a preprocessed BOLD run in MNI152NLin2009cAsym space. First, a reference volume and its skull-stripped version were generated using a custom methodology of fMRIPrep. Automatic removal of motion artifacts using independent component analysis (ICA-AROMA, Pruim et al., 2015) was performed on the preprocessed BOLD on MNI space time-series after removal of non-steady state volumes and spatial smoothing with an isotropic, Gaussian kernel of 6mm FWHM (full-width half-maximum). Corresponding “non-aggressively” denoised runs were produced after such smoothing. Additionally, the “aggressive” noise-regressors were collected and placed in the corresponding confounds file. All resamplings can be performed with a single interpolation step by composing all the pertinent transformations (i.e. head-motion transform matrices, susceptibility distortion correction when available, and co-registrations to anatomical and output spaces). Gridded (volumetric) resamplings were performed using antsApplyTransforms (ANTs), configured with Lanczos interpolation to minimize the smoothing effects of other kernels (Lanczos, 1964). Non-gridded (surface) resamplings were performed using mri\_vol2surf (FreeSurfer).

## **2 Supplementary Tables**

Table S1.

|                                                       | Non-Cannabis Users (n = 37)                              |                                                            | Cannabis Users (n = 39)                                  |                                                            |
|-------------------------------------------------------|----------------------------------------------------------|------------------------------------------------------------|----------------------------------------------------------|------------------------------------------------------------|
|                                                       | Male<br>(n = 15)<br>% or <i>M</i> ( <i>SD</i> )<br>Range | Female<br>(n = 22)<br>% or <i>M</i> ( <i>SD</i> )<br>Range | Male<br>(n = 26)<br>% or <i>M</i> ( <i>SD</i> )<br>Range | Female<br>(n = 13)<br>% or <i>M</i> ( <i>SD</i> )<br>Range |
| Age (y)                                               | 21.07 (3.10)                                             | 21.09 (2.49)                                               | 21.04 (2.31)                                             | 22.15 (2.27)                                               |
| Reading score<br>(WRAT-IV)                            | 107.20 (9.06)                                            | 104.64 (10.68)                                             | 107.77 (13.13)                                           | 102.15 (7.72)                                              |
| % Caucasian                                           | 67.67%                                                   | 72.73%                                                     | 80.77%                                                   | 46.15%                                                     |
| % Not<br>Hispanic/Latino/a                            | 93.33%                                                   | 81.82%                                                     | 80.77%                                                   | 76.92%                                                     |
| Past-year Alcohol<br>Use (Standard<br>Drinks)         | 131.37 (196.27)                                          | 68.43 (97.89)                                              | 312.46 (294.96)                                          | 271.12 (287.39)                                            |
| Cotinine level                                        | 1.07 (.70)                                               | 1.18 (.73)                                                 | 2.12 (2.08)                                              | 1.23 (.60)                                                 |
| Past-year Nicotine<br>Use                             | .20 (.41)                                                | .80 (2.64)                                                 | 234.87 (534.73)                                          | 32.10 (68.48)                                              |
| Past-year Cannabis<br>Use (joints)                    | .27 (.70)                                                | .05 (.21)                                                  | 364.40 (520.38)                                          | 208.79 (274.96)                                            |
| Lifetime Cannabis<br>Use (joints)                     | 1.60 (5.14)                                              | 2.52 (5.11)                                                | 1164.42 (1621.71)                                        | 773.23 (629.86)                                            |
| Age of regular<br>cannabis use<br>initiation (weekly) |                                                          |                                                            | 16.27 (2.20)                                             | 15.85 (2.30)                                               |
| Duration of<br>Abstinence (Days)                      |                                                          |                                                            | 35.12 (16.41)                                            | 30.85 (9.56)                                               |

Population comparison of Male and Female cannabis users and non-users. The 39 cannabis users does not include 7 cannabis users within missing data which were withheld from the analysis within cannabis users.
